# Supplementary material for: A neuroprotective astrocyte state is induced by neuronal signal EphB1 but fails in ALS models
Source: PubMed Central journal article supplement (PMC5660125; doi:10.1038/s41467-017-01283-z), 2017-10-27
Supplement: 41467_2017_1283_MOESM1_ESM.pdf [file 41467_2017_1283_MOESM1_ESM.pdf]

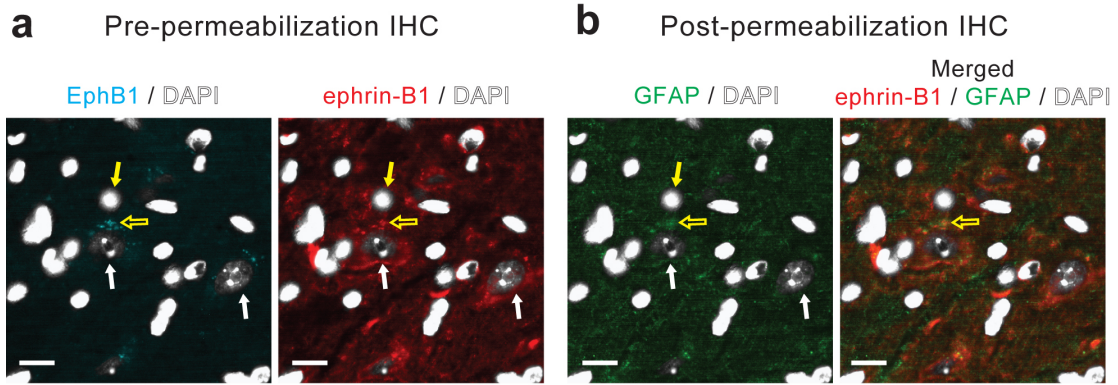

**c** EphB1+ neurons in the FMN

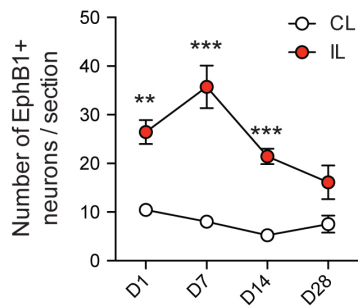

**d** Proportion of EphB1+ neurons in the IL FMN

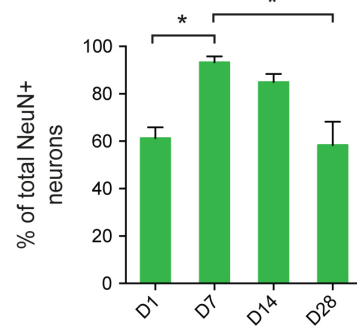

**Supplementary Figure 1 | EphB1 expression in axotomized neurons in the facial motor nucleus.** (a) EphB1 and ephrin-B1 immunostaining in the axotomized facial motor nucleus (FMN) without permeabilization of sections and (b) co-localizing ephrin-B1/GFAP IR following permeabilization with 0.1% Triton. (c) Graph showing average number of EphB1 positive neurons per section in both the IL and CL FMN post facial nerve axotomy (n = 3, 3, 3, 4 per timepoint, respectively; \*\*p≤0.01, \*\*\*p≤0.001,  $F_{\text{time}} = 100.8$  and  $F_{\text{axotomy}} = 7.7$ ; two-way ANOVA with Bonferroni comparison between IL and CL values). (d) Bar graph showing mean percentage of EphB1 positive neurons in the IL FMN over total NeuN labeled cells (n = 3 mice; \*p ≤0.05, F = 6.25; one-way ANOVA with Tukey post-hoc test; see also Fig. 1). Data expressed as ± SEM. Scale bar: 30 μm.

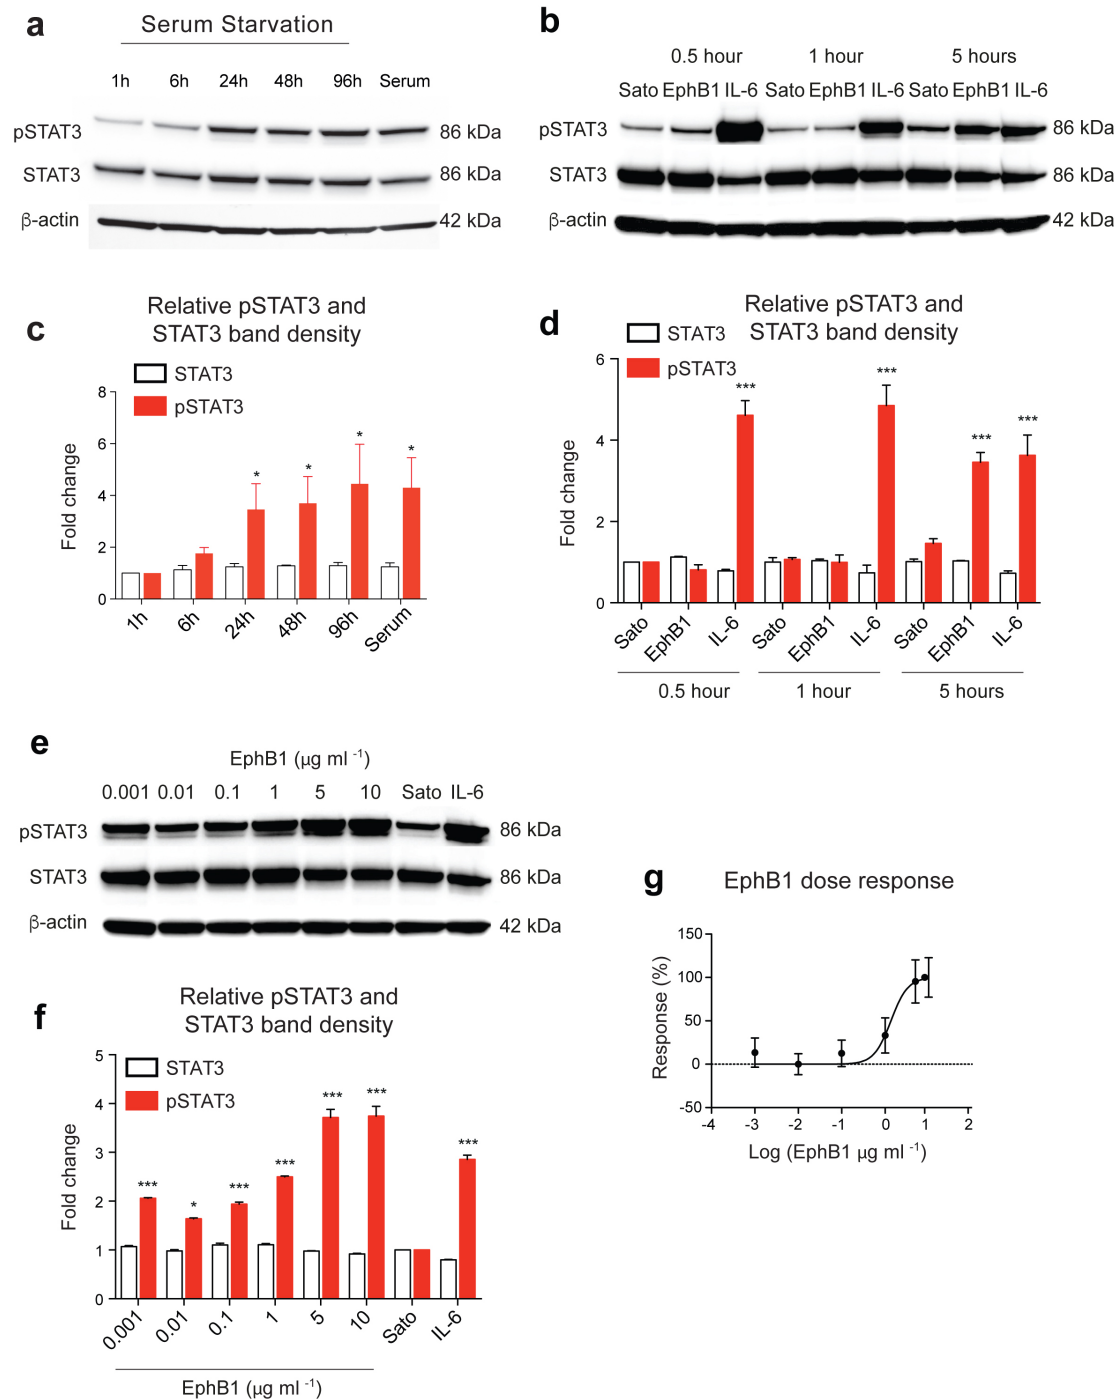

**Supplementary Figure 2 | Optimization of EphB1 treatments for assessing STAT3 phosphorylation.** (a) STAT3 phosphorylation response detected by western blotting to serum starvation at 1, 6, 24, 48 and 96 hrs in comparison with total STAT3 and β-actin IR and to the effect of serum. (b) Western blot shows STAT3 phosphorylation at 0.5h, 1h or 5 hours of treatment with either IL-6, or clustered EphB1 (5 μg ml<sup>-1</sup>). (c,d) Graphs demonstrate relative band densities when compared to the 1-hour value for a and c and 0.5-hour value for b and d after normalization to the β-actin band for each time point. N = duplicate cultures of 6 mice; \*p = 0.044, \*p = 0.029, \*p = 0.015, \*p = 0.033, F = 4.6 for c and \*\*\*p ≤ 0.001, F = 120.8 for d; one-way ANOVA with Dunnett's comparison. (e) Blots demonstrate STAT3 phosphorylation following a stimulation of 5 hours with clustered EphB1 at the following concentrations: 0.001, 0.01, 0.1, 1, 5, 10 μg ml<sup>-1</sup>. Serum free medium (Sato) was used as negative control. (f) Bar graphs show relative band densities of pSTAT3 and total STAT3 to the control samples (Sato) after normalized to β-actin density. N = duplicate cultures from 6 mice; \*\*\*p ≤ 0.001, \*p ≤ 0.05, F = 232.1; one-way ANOVA with Dunnett's post-hoc test). (g) A dose-response curve was obtained by measuring levels of STAT3 phosphorylation by western blots. Data plotted is log of EphB1 concentration (μg ml<sup>-1</sup>) against percentage of elicited response (EC<sub>50</sub> = 1.359). Data expressed as mean of fold increase ± SEM. See also Suppl. Fig. 10 for western blots.

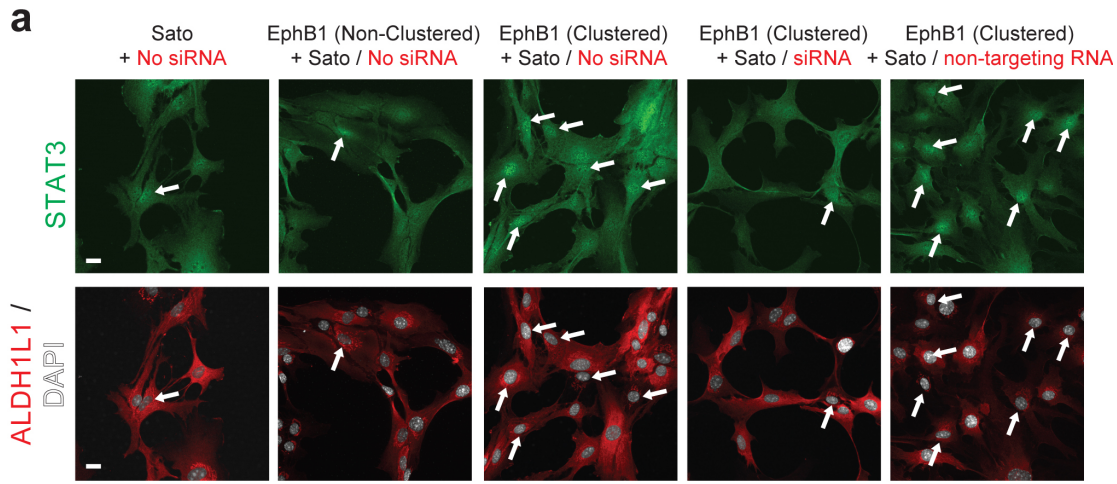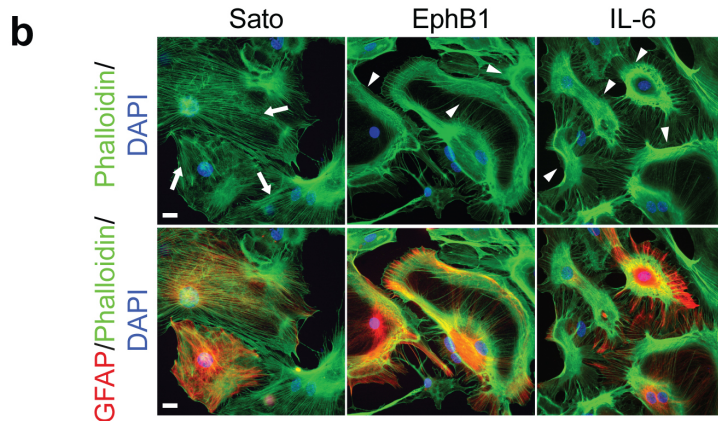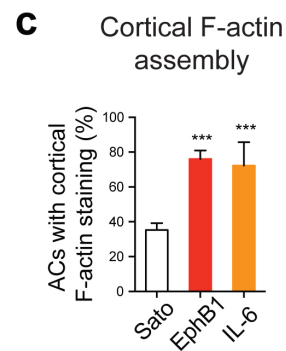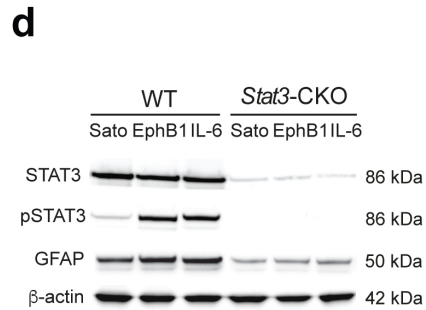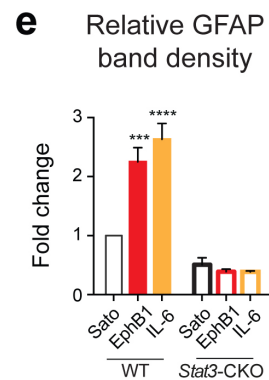

**Supplementary Figure 3 | EphB1 induces STAT3 activation via ephrin-B1, and triggers STAT3-dependent reactive morphological transformation in astrocytes.** (a) Immunofluorescence images of nSTAT3 and ALDH1L1/DAPI IR in corresponding spinal astrocytes (ACs) treated with non-clustered or clustered EphB1-Fc with or without ephrin-B1 siRNA or non-targeting RNA (also see Fig. 3). (b) Representative images showing EphB1 and IL-6-induced rearrangements of the actin cytoskeleton in cortical astrocytes. Phalloidin labelled F-actin is mostly organised in parallel fibres (*full arrows*) in Sato's medium. astrocytes stimulated with EphB1 or IL-6 display organized thick cortical actin rings with radial thinner fibres (*arrowheads*). (c) Bar graph shows the percentage of astrocytes bearing cortical thick actin bundles. N = 5, 5, 6 from 3 cultures of 6 mice; \*\*\* $p \leq 0.001$ , F = 31.89; one-way ANOVA with Bonferroni post-hoc test. (d) Western blot on whole cell lysates analysing the effects of EphB1 treatment on the expression levels of total STAT3, pSTAT3 and GFAP in both WT and STAT3-CKO astrocytes. (e) Bar graph show relative band density of GFAP to control bands (Sato) as fold change after normalization to  $\beta$ -actin band densities. N = 3 independent cultures; \*\*\* $p = 0.0004$ ; \*\*\*\* $p \leq 0.0001$ , F = 68.9; one-way ANOVA with Dunnett's comparisons). Data are expressed as mean  $\pm$  SEM. Scale bar: 20  $\mu$ m.

**a** Specific EphB1 induced genes

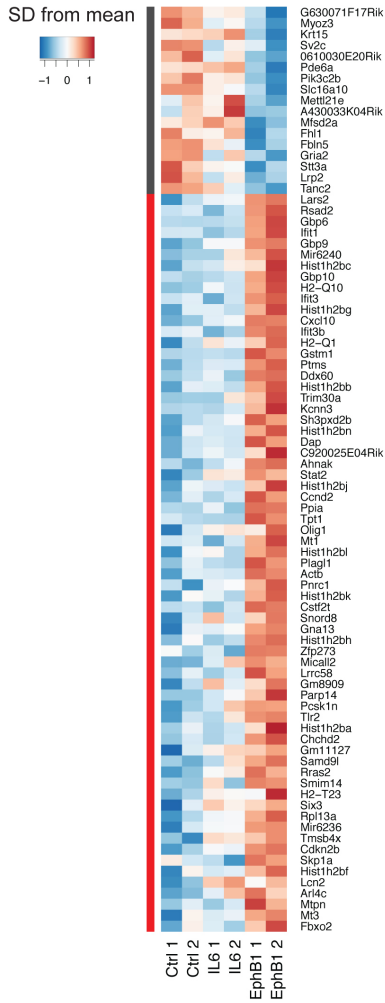

**b** Stat3 regulators

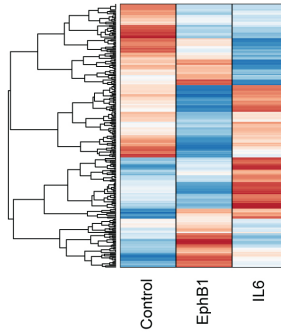

**c** Stat3 targets

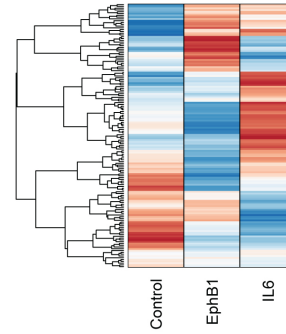

**d** Axon inhibitory transcripts

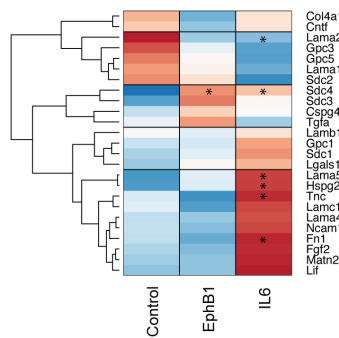

**e** Axon permissive transcripts

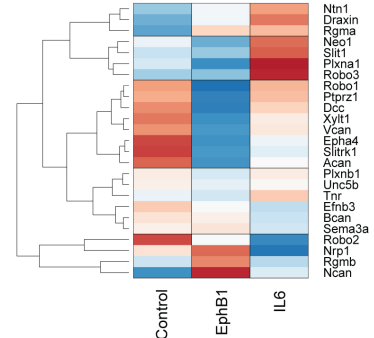

**Supplementary Figure 4 | EphB1 and IL-6-induced mouse astrocytic transcriptome-wide signatures.** (a) Heatmap showing specifically induced genes by EphB1 when compared to IL-6. Other heatmaps show comparisons between EphB1 or IL-6 with regard to induced genes related to (b) Stat3 regulators, (c) Stat3 targets, (d) axon growth inhibitory molecules and (e) axon growth permissive molecules (defined by published lists<sup>3</sup>). Gene expression data represent SD from mean of variance-stabilized values across rows.

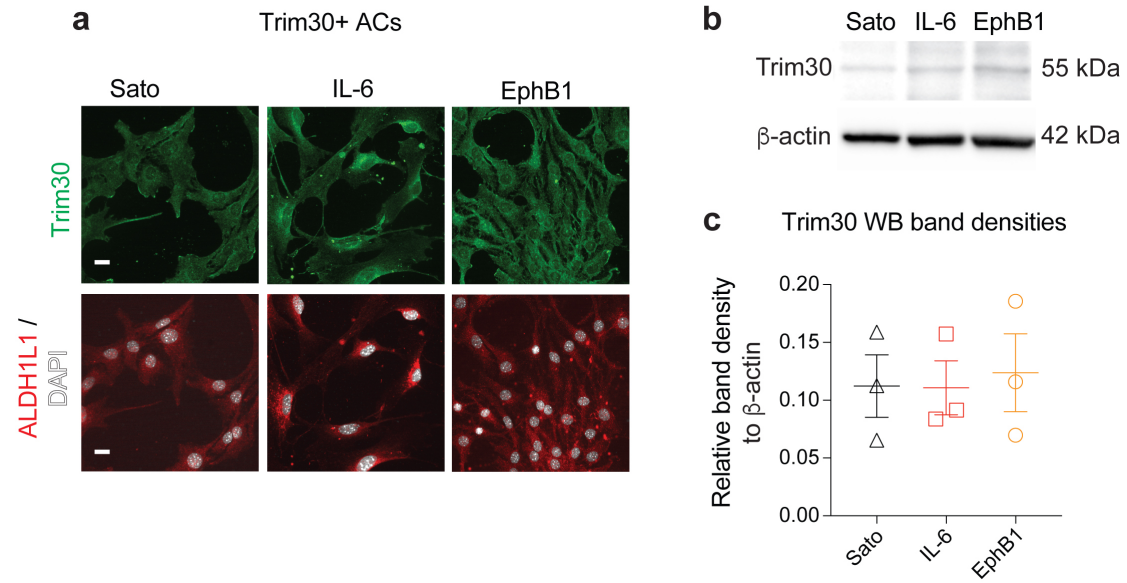

**Supplementary Figure 5 | Additional characterization of EphB1 and IL-6 induced mouse astrocytic phenotypes.** (a) Immunofluorescence demonstrating Trim30 IR in cultured ALDH1L1/DAPI positive astrocytes (ACs) exposed to IL-6 or EphB1 treatment or untreated. (b) Western blots for Trim30 and  $\beta$ -actin of the same astrocyte samples. (c) Dot plot graph represent WB band density measurements normalized to  $\beta$ -actin ( $n = 3$  cultures of 6 mice;  $p = 0.999$  and  $p = 0.944$  for IL6 and EphB1 respectively,  $F = 0.063$ ; one-way ANOVA with Bonferroni post-hoc test). Data expressed as  $\pm$  SEM. Scale bar: 20  $\mu$ m. See also Suppl. Fig. 10 for western blot.

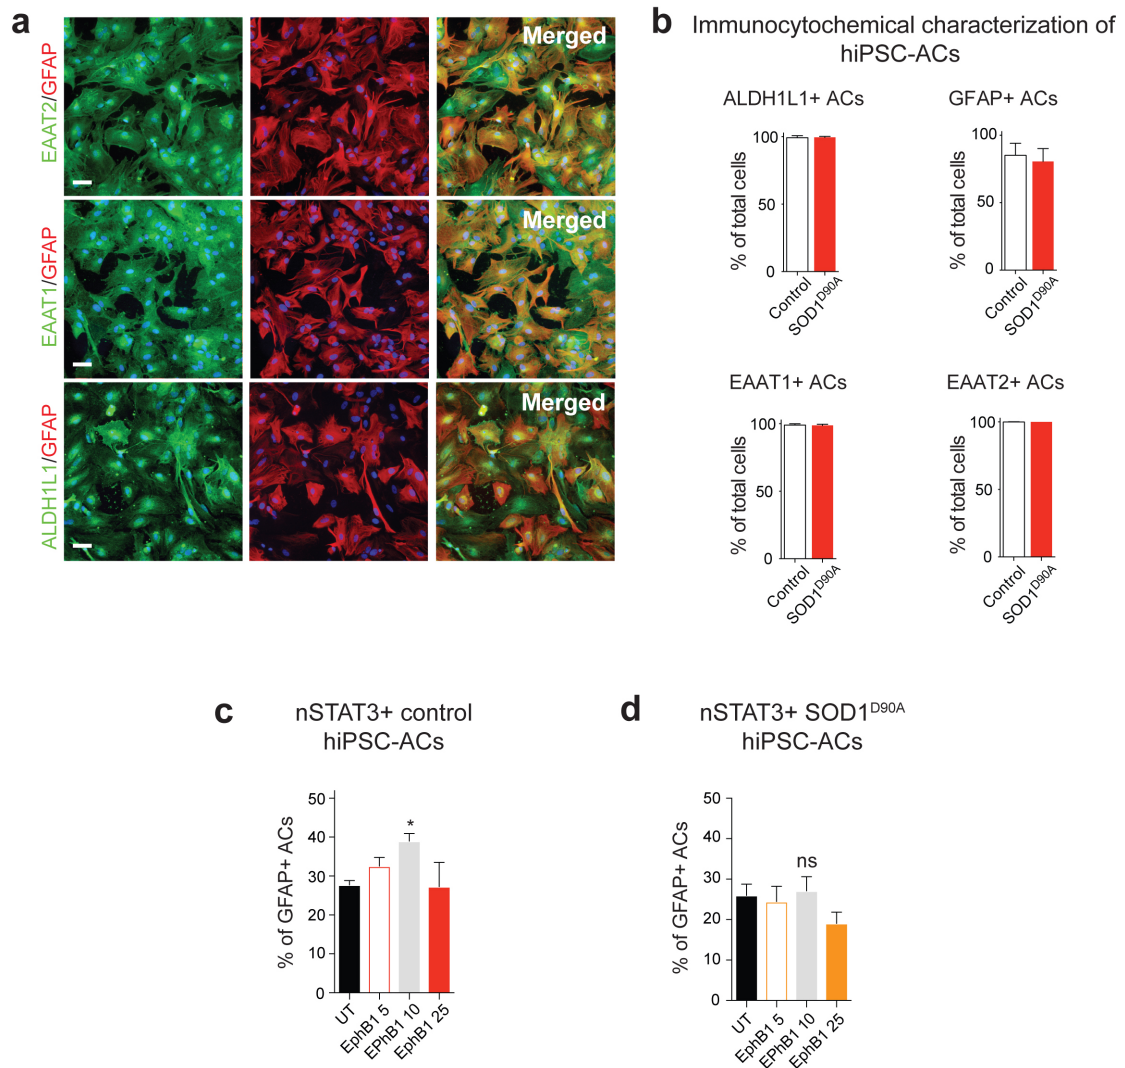

**Supplementary Figure 6 | Characterization of hiPSC-astrocytes and their dose dependent response to EphB1.** (a) Representative immunofluorescence images showing expression of astrocyte (AC) markers in hiPSC-astrocyte cultures, including ALDH1L1, GFAP, EAAT1 and EAAT2. (b) Bar graphs show the proportion of cells (%) positive for each marker over total number of cells identified by DAPI staining. (c,d) Dose dependent response of nSTAT3 IR in hiPSC-astrocytes to EphB1 treatment. Graphs represent the proportion of nSTAT3 positive cells amongst the total number of GFAP positive control (c) and in SOD1-mutant hiPSC-astrocytes (d). N = 6 cultures of 3 independently converted hiPSC-astrocytes from 2 healthy control and 1 ALS patient lines; \*p = 0.046, F = 2.99 for SOD1-mutant astrocytes and F = 1.22 for control astrocytes; one-way ANOVA with Dunnett's post-hoc test). Data is expressed as mean ± SEM. Scale bar: 40 μm.

Independent analysis of the isogenic (genetically corrected) control SOD1<sup>D90D</sup> and mutant SOD1<sup>D90A</sup> hiPSC-astrocytes

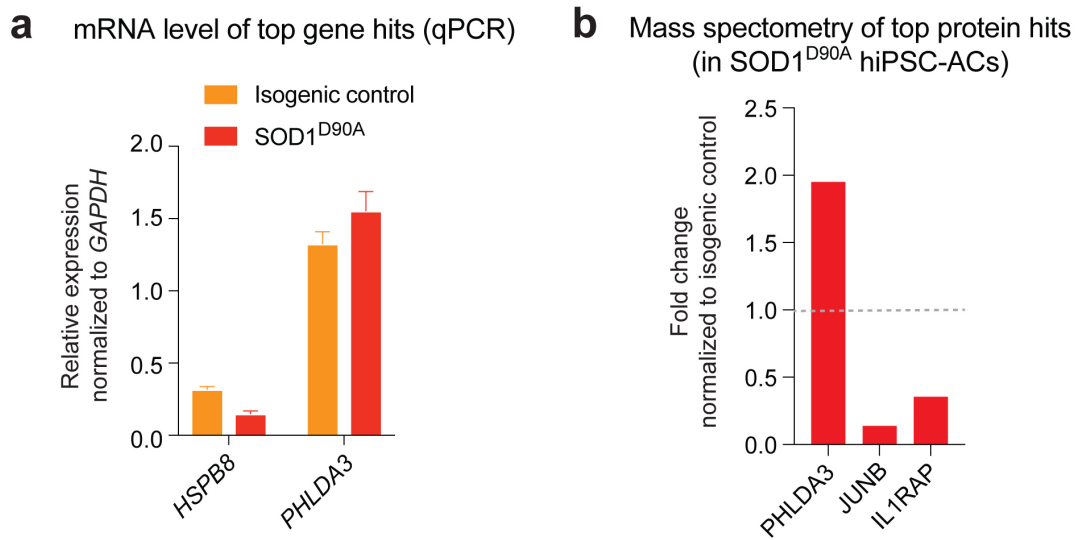

**Supplementary Figure 7 | SOD1<sup>D90A</sup>-mutant line and its isogenic control: independent verification of top findings in hiPSC-astrocytes by qPCR and mass spectrometry.** (a) Graph indicates *HSPB8* and *PHLDA3* mRNA levels relative to *GAPDH* and expressed as fold-change ( $n = 2$  independently converted astrocyte cultures). (b) Measurements of relative protein levels by mass spectrometry (MS) in SOD1 hiPSC-astrocytes (ACs) normalized to the levels for isogenic control astrocytes ( $n =$  one sample each of isogenic corrected and SOD1-mutant line with replicate labelling for MS).

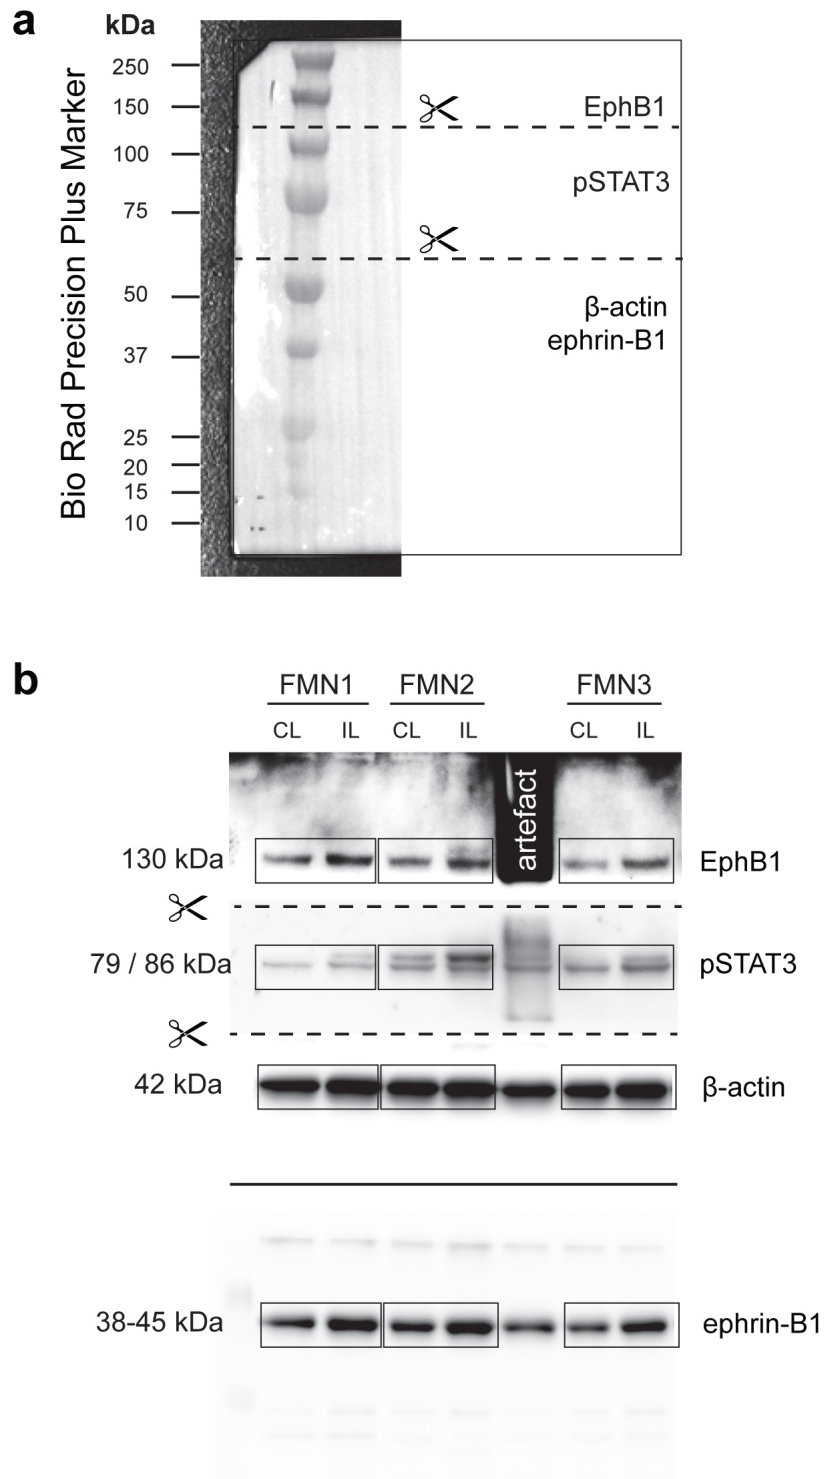

**Supplementary Figure 8** | Whole western blots for Figure 1f. Membranes were cut guided by a marker (**a**) and/or stripped to enable simultaneous detection of multiple proteins in the same sample (**b**).



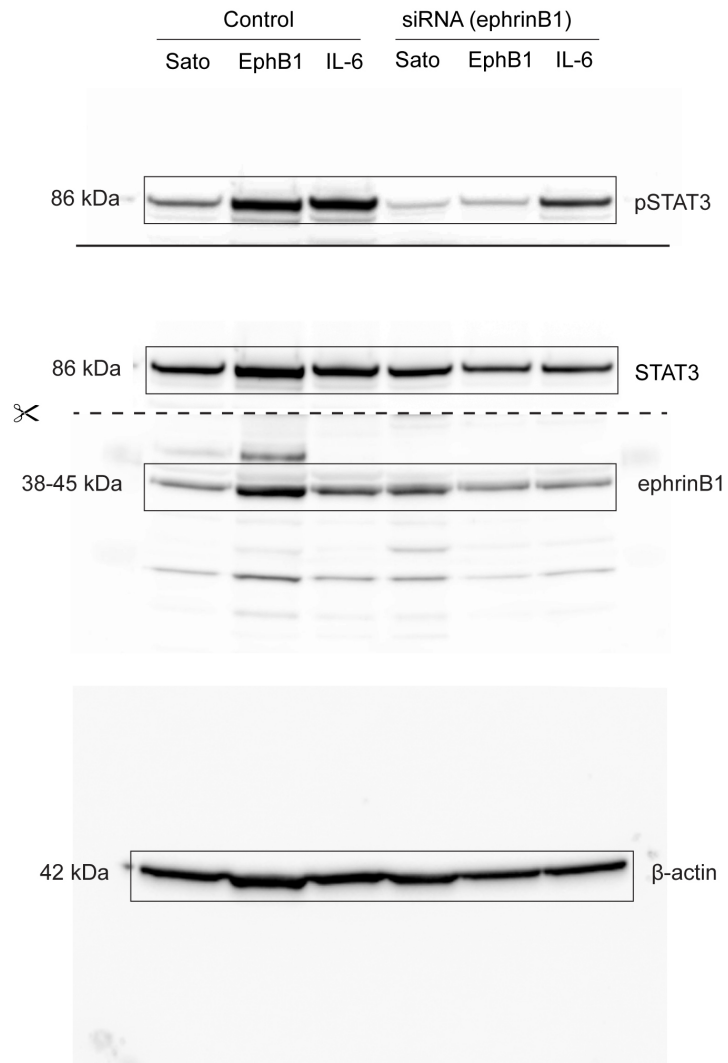

**Supplementary Figure 9** | Whole western blots for Figure 2c.

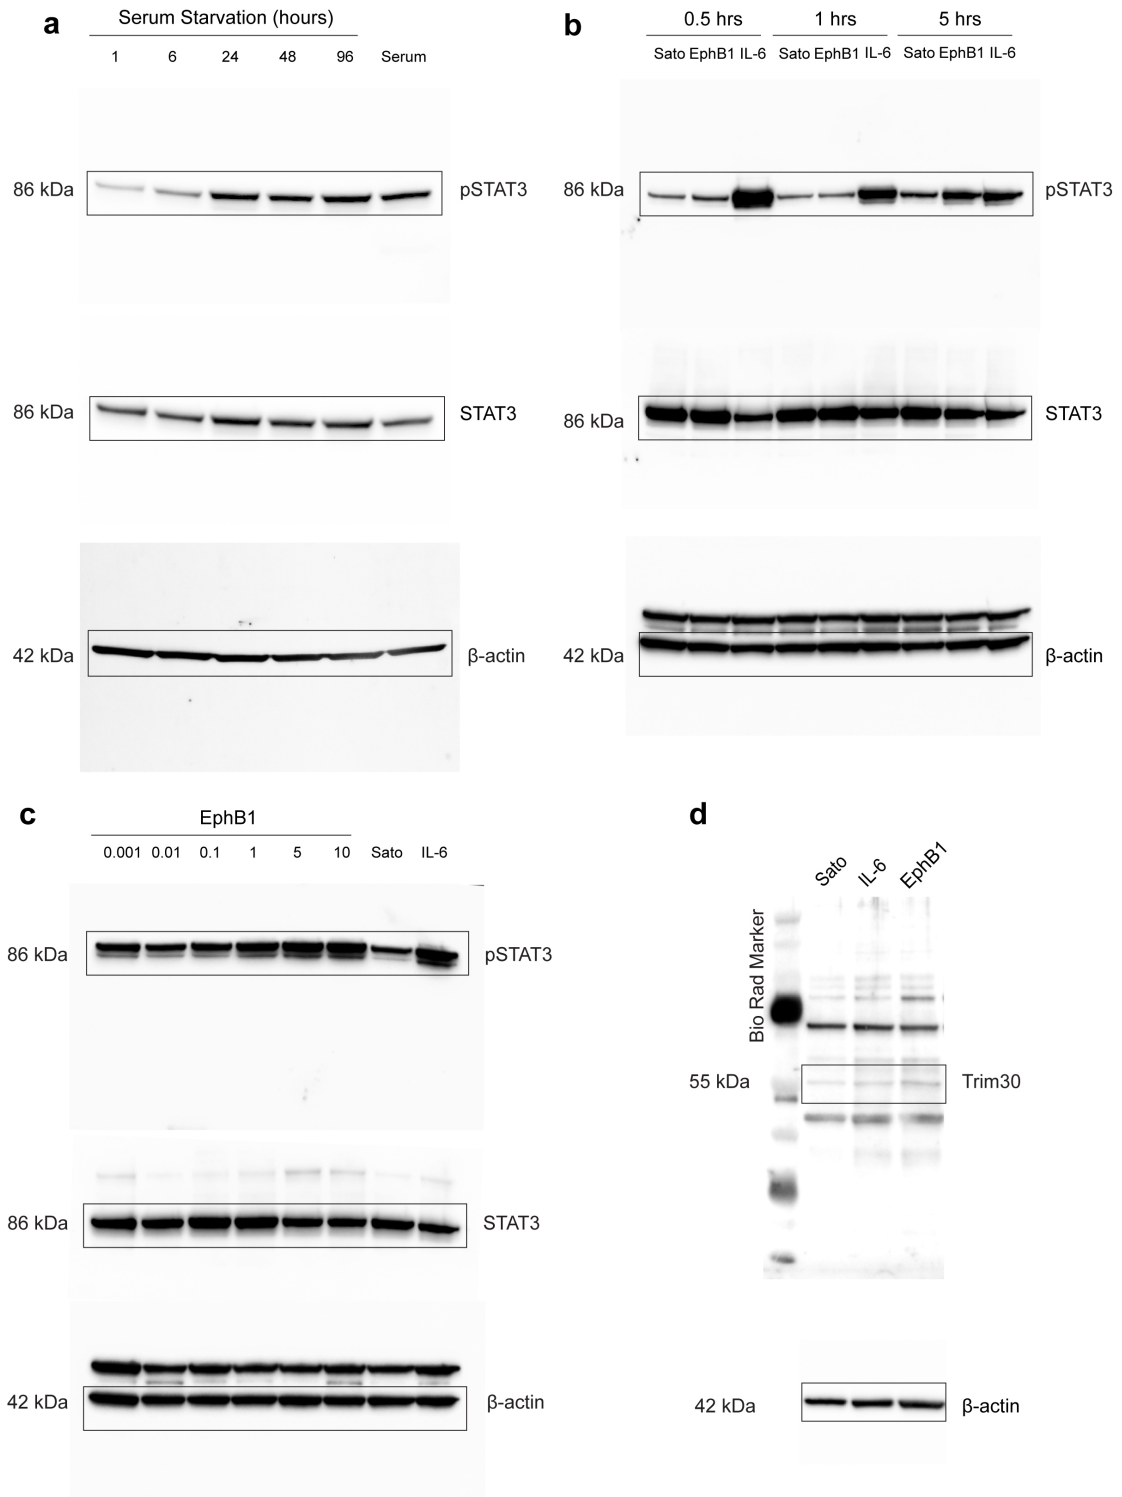

**Supplementary Figure 10** | Whole western blots for Supplementary Figure 2a (a), 2b (b), 2e (c) and for Supplementary Figure 5b (d).

**Supplementary Table 1 | Details of human iPSC lines used**

| Line ID                                                                | Mutation             | Age<br>(years) | Gender | Source                                                                                                                    |
|------------------------------------------------------------------------|----------------------|----------------|--------|---------------------------------------------------------------------------------------------------------------------------|
| Control-1                                                              | None                 | 78             | Male   | <a href="https://www.ncbi.nlm.nih.gov/pmc/articles/PMC4550814/">https://www.ncbi.nlm.nih.gov/pmc/articles/PMC4550814/</a> |
| Control-2                                                              | None                 | 64             | Male   | Coriell (ND41866*C)                                                                                                       |
| Control-3                                                              | None                 | Unknown        | Female | ThermoFisher Scientific (A18945)                                                                                          |
| SOD1-1                                                                 | SOD1 <sup>D90A</sup> | 70             | Female | Coriell (ND35664)                                                                                                         |
| SOD1-2                                                                 | SOD1 <sup>D90A</sup> | 50             | Female | Su-Chun Zhang's lab                                                                                                       |
| SOD1 <sup>D90D</sup><br>Corrected<br>isogenic<br>control for<br>SOD1-2 | None                 | 50             | Female | Su-Chun Zhang's lab                                                                                                       |

**Supplementary Table 2 | List of primers used for qPCR**

| <b>Target</b>  | <b>Species</b> | <b>Assay ID</b> | <b>Assay Info</b> | <b>Source</b> |
|----------------|----------------|-----------------|-------------------|---------------|
| <i>A2m</i>     | Mouse          | qMmuCID0021890  | Intron-spanning   | Bio-Rad       |
| <i>Cebpd</i>   | Mouse          | Mm_Cebpd_1_SG   | Intron-spanning   | Qiagen        |
| <i>Gapdh</i>   | Mouse          | qMmuCID0027497  | Exonic            | Bio-Rad       |
| <i>Kcnn3</i>   | Mouse          | qMmuCID0011935  | Intron-spanning   | Bio-Rad       |
| <i>Mt1</i>     | Mouse          | qMmuCID0003677  | Exonic            | Bio-Rad       |
| <i>Trim30a</i> | Mouse          | qMmuCID0007007  | Intron-spanning   | Bio-Rad       |
| <i>CEBPD</i>   | Human          | qHsaCED0002556  | Exonic            | Bio-Rad       |
| <i>GAPDH</i>   | Human          | qHsaCED0038674  | Exonic            | Bio-Rad       |
| <i>HSPB8</i>   | Human          | qHsaCID0018781  | Intron-spanning   | Bio-Rad       |
| <i>KCNJ10</i>  | Human          | qHsaCID0013161  | Intron-spanning   | Bio-Rad       |
| <i>LRP2</i>    | Human          | qHsaCID0012030  | Intron-spanning   | Bio-Rad       |
| <i>PHLDA3</i>  | Human          | qHsaCID0022631  | Intron-spanning   | Bio-Rad       |
